# Supplementary material for: A novel PAX7 10-bp indel variant modulates promoter activity, gene expression and contributes to different phenotypes of Chinese cattle
Source: PubMed Central journal article supplement (PMC5789009; doi:10.1038/s41598-018-20177-8), 2018-01-29
Supplement: 41598_2018_20177_MOESM1_ESM.pdf [file 41598_2018_20177_MOESM1_ESM.pdf]

1 **Title page**

2 **A novel *PAX7* 10-bp indel variant modulates promoter activity, gene**  
3 **expression and contributes to different phenotypes of Chinese cattle**

4 Yao Xu<sup>1,2</sup>, Tao Shi<sup>1</sup>, Yang Zhou<sup>1</sup>, Mei Liu<sup>1</sup>, Sebastian Klaus<sup>3</sup>, Xianyong Lan<sup>1</sup>,  
5 Chuzhao Lei<sup>1</sup>, Hong Chen<sup>1\*</sup>

6 <sup>1</sup> College of Animal Science and Technology, Northwest A & F University, Shaanxi Key  
7 Laboratory of Molecular Biology for Agriculture, Yangling, Shaanxi 712100, China

8 <sup>2</sup> Institute of Biology and Medicine, College of Life Science and Health, Wuhan University of  
9 Science and Technology, Wuhan, Hubei 430081, China

10 <sup>3</sup> Chengdu Institute of Biology, Chinese Academy of Sciences, Chengdu, Sichuan 610041, China

11 \*Corresponding Author: Hong Chen

12 Tel: +86-029-87092012.

13 Fax: +86-029-87092164.

14 E-mail: [chenhong1212@263.net](mailto:chenhong1212@263.net)

15 Address: No.22 Xinong Road,  
16 College of Animal Science and Technology,  
17 Northwest A&F University,  
18 Yangling, Shaanxi 712100, P. R. China.

19  
20

21 **Supplementary Table S1 Information of primer sets used in this study.**

| Primer name     | Primer sequences (5'-3')                                                        | Annealing temperature (°C) | Fragment size (bp) |
|-----------------|---------------------------------------------------------------------------------|----------------------------|--------------------|
| P1              | F: GCAGAAGGGTCCGGTCATTC<br>R: ACCTTCCAGGGGAAACCCC                               | 61.6                       | 1868               |
| P2              | F: CGCGTTACAACCAGCACTTC<br>R: GCCTTCTTTCTCCGACCAC                               | 59.2                       | 208/218            |
| pGL3-pro1       | F: <u>CTAGCTAG</u> CAAAATGGGGCTCCCTCCT<br>R: <u>CTAAGCTT</u> AAAACCGCTTTCGGTCC  | 60.5                       | 1680               |
| pGL3-pro2       | F: <u>GTGGTACCC</u> GGGCAAGAACAGGACA<br>R: <u>CTAAGCTT</u> AAAACCGCTTTCGGTCC    | 66.3                       | 1355               |
| pGL3-pro3       | F: <u>GTGGTACCC</u> TTACCCGGCGGATCGCTCT<br>R: <u>CTAAGCTT</u> AAAACCGCTTTCGGTCC | 61.7                       | 743                |
| pGL3-pro4       | F: <u>GTGGTACCC</u> CCCGATCCCCCGCCA<br>R: <u>CTAAGCTT</u> AAAACCGCTTTCGGTCC     | 68.9                       | 400                |
| pGL3-pro5       | F: <u>GTGGTACCT</u> GTTTGTGTTGAACTTCCTC<br>R: <u>CTAAGCTT</u> AAAACCGCTTTCGGTCC | 64.0                       | 266                |
| pEGFP-ZNF219    | F: <u>GGAATT</u> CTATGGAGGGCTCACGTCCC<br>R: <u>GGGATCC</u> CTACCTTTCTTGGCCCCCT  | 66.2                       | 2166               |
| pcDNA3.1-ZNF219 | F: <u>GGAATC</u> ATGGAGGGCTCACGTCCC<br>R: <u>GGAATC</u> CTACCTTTCTTGGCCCCCT     | 66.2                       | 2166               |
| qPCR primer     |                                                                                 |                            |                    |
| <i>Pax7</i>     | F: GAGGACGAAGCGGACAAGAA<br>R: TACGCTTCAGAGGGAGGTCG                              | 60                         | 139                |
| <i>Id2</i>      | F: ATCGTTAGCCTGCACCACC<br>R: TCAGCCACAGAGAGCTTTGC                               | 60                         | 153                |
| <i>Id3</i>      | F: CGCGTCATCGACTACATCCT<br>R: GATCACAAGTTCCGGAGCGA                              | 60                         | 117                |
| <i>CXCR4</i>    | F: TCTCCTGCCTGGTATCGTCA<br>R: AATGTAGTAGGGCAGCCAGC                              | 60                         | 148                |
| <i>Myf5</i>     | F: CCCACCTCAAGTTGCTCTGA<br>R: AGGAGCTTTTATCCGTGGCA                              | 60                         | 127                |
| <i>MRF4</i>     | F: GGCTGGATCAGCAGGACAAA<br>R: CAGTTATCACGAGCCCCCTG                              | 60                         | 153                |
| <i>MyoD</i>     | F: GAACACTACAGCGGCGACTC<br>R: GCTGTAGTAAGTGCGGTCGT                              | 60                         | 126                |
| <i>MyoG</i>     | F: GCAGCGCCATCCAGTACATA<br>R: GAGCTGCATTCACTGGGCA                               | 60                         | 124                |
| <i>GAPDH</i>    | F: AATGAAAGGGCCATCACCATC<br>R: GTGGTTCACGCCATCACA                               | 60                         | 204                |

22 The italic and bold bases indicate recognition sites of restriction endonucleases, and the underlined  
23 were attached nucleotides

24

25
