# Supplementary material for: A novel PAX7 10-bp indel variant modulates promoter activity, gene expression and contributes to different phenotypes of Chinese cattle
Source: PubMed Central journal article supplement (PMC5789009; doi:10.1038/s41598-018-20177-8), 2018-01-29
Supplement: 41598_2018_20177_MOESM2_ESM.pdf [file 41598_2018_20177_MOESM2_ESM.pdf]

1 **Title page**

2 **A novel *PAX7* 10-bp indel variant modulates promoter activity, gene**  
3 **expression and contributes to different phenotypes of Chinese cattle**

4 Yao Xu<sup>1,2</sup>, Tao Shi<sup>1</sup>, Yang Zhou<sup>1</sup>, Mei Liu<sup>1</sup>, Sebastian Klaus<sup>3</sup>, Xianyong Lan<sup>1</sup>,  
5 Chuzhao Lei<sup>1</sup>, Hong Chen<sup>1\*</sup>

6 <sup>1</sup> College of Animal Science and Technology, Northwest A & F University, Shaanxi Key  
7 Laboratory of Molecular Biology for Agriculture, Yangling, Shaanxi 712100, China

8 <sup>2</sup> Institute of Biology and Medicine, College of Life Science and Health, Wuhan University of  
9 Science and Technology, Wuhan, Hubei 430081, China

10 <sup>3</sup> Chengdu Institute of Biology, Chinese Academy of Sciences, Chengdu, Sichuan 610041, China

11 \*Corresponding Author: Hong Chen

12 Tel: +86-029-87092012.

13 Fax: +86-029-87092164.

14 E-mail: [chenhong1212@263.net](mailto:chenhong1212@263.net)

15 Address: No.22 Xinong Road,  
16 College of Animal Science and Technology,  
17 Northwest A&F University,  
18 Yangling, Shaanxi 712100, P. R. China.

19  
20

21 **Supplementary Table S2 Association analysis of the *PAX7* 10-bp indel with**  
 22 **growth traits in NY cattle aged 18/24 months.**

| Age       | Growth traits          | <i>PAX7</i> -10-bp indel genotypes (Mean $\pm$ SE) |                   |                   | <i>P</i> -value |
|-----------|------------------------|----------------------------------------------------|-------------------|-------------------|-----------------|
|           |                        | Ins-Ins(n = 54)                                    | Ins-Del(n = 111)  | Del-Del( n = 55)  |                 |
| 18 months | Body weight, kg        | 312.21 $\pm$ 8.06                                  | 299.70 $\pm$ 4.27 | 294.96 $\pm$ 5.81 | 0.224           |
|           | Body height, cm        | 120.79 $\pm$ 1.80                                  | 121.20 $\pm$ 0.95 | 123.15 $\pm$ 1.29 | 0.412           |
|           | Body length, cm        | 129.79 $\pm$ 1.85                                  | 130.36 $\pm$ 0.98 | 128.96 $\pm$ 1.33 | 0.700           |
|           | Heart girth, cm        | 159.00 $\pm$ 2.12                                  | 156.90 $\pm$ 1.12 | 154.11 $\pm$ 1.52 | 0.144           |
|           | Hucklebone width, cm   | 23.46 $\pm$ 0.49                                   | 23.33 $\pm$ 0.26  | 22.63 $\pm$ 0.35  | 0.216           |
|           | Average daily gain, kg | 0.46 $\pm$ 0.06                                    | 0.44 $\pm$ 0.03   | 0.35 $\pm$ 0.04   | 0.118           |
| 24 months | Body weight, kg        | 358.86 $\pm$ 10.02                                 | 373.45 $\pm$ 5.35 | 366.74 $\pm$ 7.21 | 0.408           |
|           | Body height, cm        | 125.29 $\pm$ 1.13                                  | 127.22 $\pm$ 0.60 | 126.44 $\pm$ 0.81 | 0.301           |
|           | Body length, cm        | 136.29 $\pm$ 1.99                                  | 139.06 $\pm$ 1.07 | 138.25 $\pm$ 1.44 | 0.475           |
|           | Heart girth, cm        | 166.36 $\pm$ 2.65                                  | 170.00 $\pm$ 1.42 | 168.57 $\pm$ 1.91 | 0.466           |
|           | Hucklebone width, cm   | 25.00 $\pm$ 0.64                                   | 25.43 $\pm$ 0.34  | 25.28 $\pm$ 0.46  | 0.837           |
|           | Average daily gain, kg | 0.26 $\pm$ 0.07                                    | 0.41 $\pm$ 0.04   | 0.40 $\pm$ 0.05   | 0.174           |

23

24
