# Supplementary material for: A novel PAX7 10-bp indel variant modulates promoter activity, gene expression and contributes to different phenotypes of Chinese cattle
Source: PubMed Central journal article supplement (PMC5789009; doi:10.1038/s41598-018-20177-8), 2018-01-29
Supplement: 41598_2018_20177_MOESM3_ESM.pdf [file 41598_2018_20177_MOESM3_ESM.pdf]

1 **Title page**

2 **A novel *PAX7* 10-bp indel variant modulates promoter activity, gene**  
3 **expression and contributes to different phenotypes of Chinese cattle**

4 Yao Xu<sup>1,2</sup>, Tao Shi<sup>1</sup>, Yang Zhou<sup>1</sup>, Mei Liu<sup>1</sup>, Sebastian Klaus<sup>3</sup>, Xianyong Lan<sup>1</sup>,  
5 Chuzhao Lei<sup>1</sup>, Hong Chen<sup>1\*</sup>

6 <sup>1</sup> College of Animal Science and Technology, Northwest A & F University, Shaanxi Key  
7 Laboratory of Molecular Biology for Agriculture, Yangling, Shaanxi 712100, China

8 <sup>2</sup> Institute of Biology and Medicine, College of Life Science and Health, Wuhan University of  
9 Science and Technology, Wuhan, Hubei 430081, China

10 <sup>3</sup> Chengdu Institute of Biology, Chinese Academy of Sciences, Chengdu, Sichuan 610041, China

11 \*Corresponding Author: Hong Chen

12 Tel: +86-029-87092012.

13 Fax: +86-029-87092164.

14 E-mail: [chenhong1212@263.net](mailto:chenhong1212@263.net)

15 Address: No.22 Xinong Road,  
16 College of Animal Science and Technology,  
17 Northwest A&F University,  
18 Yangling, Shaanxi 712100, P. R. China.

19

20

21

22 **Supplementary Figure S1 Full-length gel of ZNF219 binding to the *PAX7* gene**  
23 **promoter with Ins-Ins or Del-Del genotypes by ChIP assay.**

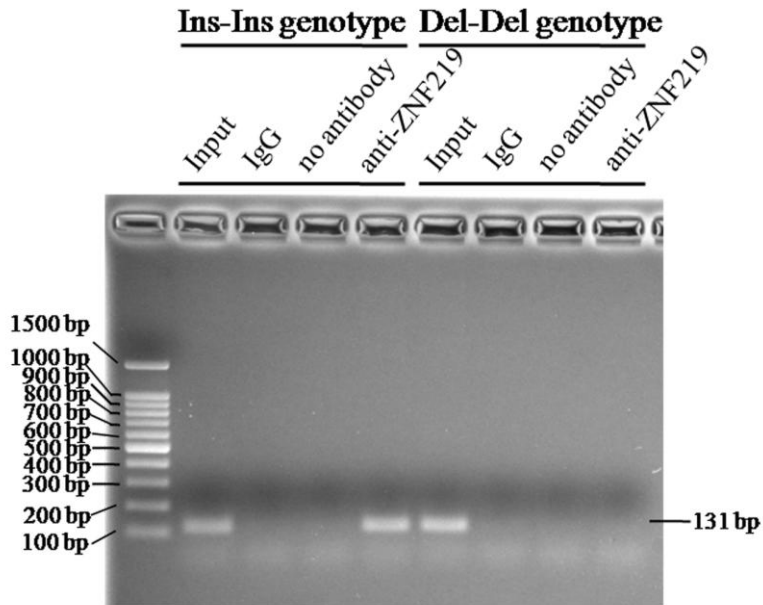

24
